# Supplementary material for: Nurse-Family Partnership and Geography: An Intersectional Perspective
Source: PubMed Central journal article supplement — Glob Qual Nurs Res. 2020 Jan 21;7:2333393619900888. doi: 10.1177/2333393619900888 (PMC6974751; doi:10.1177/2333393619900888), 2020-01-21
Supplement: Supplementary_file_1.pdf [file Supplementary_file_1.pdf]

## Supplementary File I. Semi-structured Focus Group Interview Guides

### Focus Group 1

**There are many different external factors that will influence the successful uptake of a new intervention. These factors may be related to characteristics of the nurse, the client, the organization that provides the NFP, or the NFP intervention itself. Broader social, cultural, geographical or political factors can also influence the process of how the NFP is introduced and delivered in each Health Authority.**

1.1 Can you describe the physical geography of the community from where you deliver the NFP and some of the attributes of the client groups you commonly work with?

a. How does the geography of your community influence your ability to deliver the NFP with fidelity to the model elements? [*Probe for both strengths and challenges. For nurses in rural or remote locations, have them describe how they are delivering the NFP, the challenges they experience in maintaining fidelity to the model*]

b. What innovative practice strategies have been developed within your team to understand and respond to these influences? [*Probe for nurses in rural and remote areas, it is very important to identify the changes and new clinical practices they are implementing to deliver the NFP guidelines*].

c. Among the families you work with, what are some of the challenges in their lives that make it difficult for you to implement the NFP guidelines? Difficult to develop a therapeutic relationship with the clients?

d. Can you describe some of the innovative practice strategies that you have used to address and respond to these complex issues experienced by the families you work with?

1.2 Please briefly describe for me the organizational context in which you deliver the NFP [*Probe for geography, number of nurses on the team, size of agency, size of team, physical environment of office*].

a. What organizational attributes have facilitated your ability to deliver the NFP with fidelity to the model elements? Why?

b. What organizational attributes have made it challenging for you to deliver the NFP with fidelity to the model elements?

### Focus Group 2

**Geographical factors can influence the process of how the NFP is introduced and delivered in each Health Authority.**

1.1 To begin, do you deliver NFP in a large urban area, small urban area or visit families who live in a rural environment?

1.2 Please describe how you think delivering the NFP program is different in small communities versus urban centres?

1.3 How have you adapted delivery of the NFP program to help meet the needs of clients living in [small, large or rural] communities?

a. For [smaller, larger urban, or rural] communities, describe any different ways you have attempted to engage the community?

b. What challenges do you find in delivering the NFP program to [smaller, larger urban, or rural] communities?

c. What strategies have you used to address these challenges?

d. What are the benefits of working in and delivering NFP in [smaller, larger, or rural] communities

1.4 Some NFP public health nurses are working as the sole NFP nurse in their office. How do you support other NFP nurses who are working in isolation?

1.5 In reflecting on the NFP core model elements, are there particular components of the NFP program that require adaptation for successful delivery in rural or smaller communities?
